# Supplementary material for: Hacia una Constitución Europea
Source: Springer Nature journal article supplement (doi:10.1186/s40168-021-01067-0), 2004-01-01
Supplement: MOESM2 [file 40168_2021_1067_MOESM2_ESM.pdf › 40168_2021_1067_MOESM2_ESM.pdf]

Supplementary Figure S1

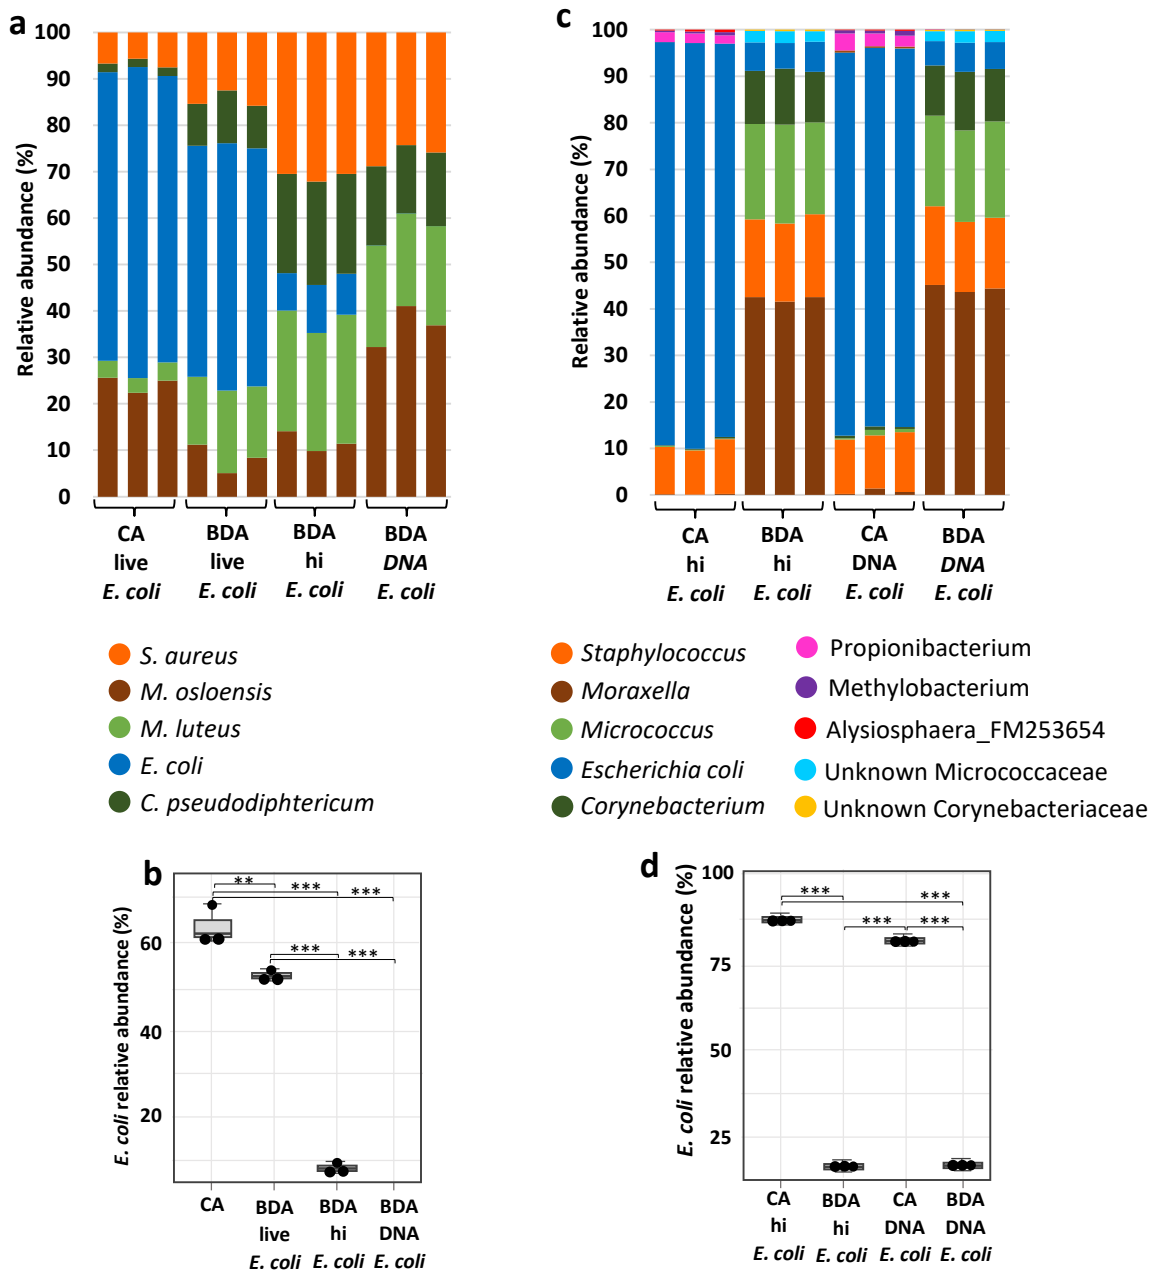

**Benzonase digest approach efficiently depletes dead bacteria and free bacterial DNA reads.** Microbial DNA was extracted using a conventional approach (CA) or the benzonase-digest approach (BDA) before bacterial lysis. **a)** Microbiome analysis of a skin mock community supplemented with live *E. coli* cells, heat inactivated (hi) *E. coli* cells or *E. coli* free DNA. **b)** Relative abundance reads resulting from *E. coli* in the mock community. **c)** Microbiome analysis at genus level of forearm skin samples spiked with hi *E. coli* or *E. coli* free DNA. **d)** Relative abundance of *E. coli* reads in spiked skin samples. P valued were calculated using Wilcoxon-Mann-Whitney test. \*  $p \leq 0.05$ , \*\*  $p \leq 0.01$ , \*\*\*  $p \leq 0.001$ .
